# Supplementary material for: The Psychological Experience of COVID-19 Vaccination and Its Impact on the Willingness to Receive Booster Vaccines among the Chinese Population: Evidence from a National Cross-Sectional Study
Source: MDPI journal article supplement (doi:10.3390/ijerph19095464), 2022-04-29
Supplement: s1 [file s1]

**Table S1.** Factor loading matrix of Chinese residents' vaccination psychological experience model.

| Items                                     | Negative Psychological Experience |        | Positive Psychological Experience |        |
|-------------------------------------------|-----------------------------------|--------|-----------------------------------|--------|
|                                           | Model                             |        | Model                             |        |
|                                           | Classification                    | Load   | Classification                    | Load   |
|                                           | Anxious                           | 0.831  | Excited                           | 0.744  |
|                                           | Angry                             | 0.892  | Relieved                          | 0.839  |
|                                           | Sick                              | 0.892  | Happy                             | 0.825  |
|                                           | Humiliated                        | 0.760  |                                   |        |
| Eigenvalues                               |                                   | 3.006  |                                   | 2.029  |
| Variance contribution rate (%)            |                                   | 42.942 |                                   | 28.988 |
| Cumulative variance contribution rate (%) |                                   | 42.942 |                                   | 71.930 |

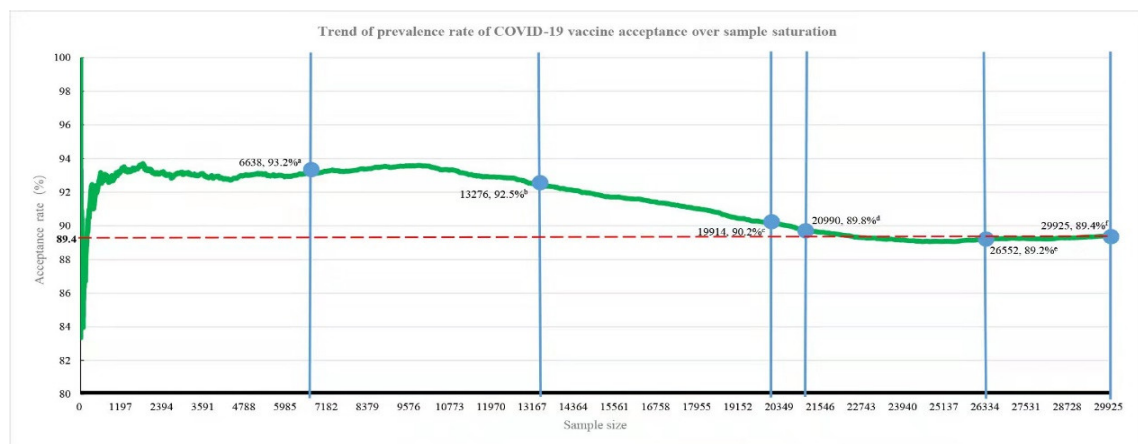

**Figure S1.** Sample saturation.

$$n = \frac{Z_{\alpha/2}^2 * P * (1 - P)}{d^2}$$

**Figure S2.** Sample Size Calculation Formula.

Note: The minimum sample size based on the COVID-19 vaccination coverage rate of 83.43% in the preliminary online survey, an allowable error of 1% and consider the missing 20% sample size.
